# Supplementary material
Source: Elsevier journal article supplement (http://radiokron.ru/common/files/manual/MMC1.pdf)
Supplement: MMC1 [file MMC1.pdf]

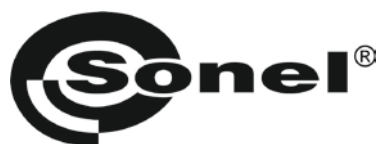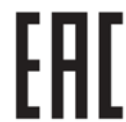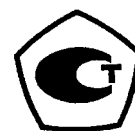

# **МАГАЗИН МЕР СОПРОТИВЛЕНИЙ ПЕТЛИ КОРОТКОГО ЗАМЫКАНИЯ ММС-1**

**РУКОВОДСТВО ПО ЭКСПЛУАТАЦИИ**

Версия 1.02

## СОДЕРЖАНИЕ

|            |                                                                       |           |
|------------|-----------------------------------------------------------------------|-----------|
| <b>1</b>   | <b>ВВЕДЕНИЕ</b> .....                                                 | <b>3</b>  |
| <b>2</b>   | <b>НАЗНАЧЕНИЕ</b> .....                                               | <b>4</b>  |
| <b>3</b>   | <b>ТЕХНИЧЕСКИЕ ДАННЫЕ</b> .....                                       | <b>4</b>  |
| <b>4</b>   | <b>КОМПЛЕКТАЦИЯ</b> .....ОШИБКА! ЗАКЛАДКА НЕ ОПРЕДЕЛЕНА.              |           |
| <b>5</b>   | <b>УСТРОЙСТВО И ПРИНЦИП РАБОТЫ</b> .....                              | <b>5</b>  |
| <b>6</b>   | <b>МАРКИРОВАНИЕ И ПЛОМБИРОВАНИЕ</b> .....                             | <b>6</b>  |
| <b>7</b>   | <b>ОБЩИЕ УКАЗАНИЯ ПО ЭКСПЛУАТАЦИИ</b> .....                           | <b>6</b>  |
| <b>8</b>   | <b>УКАЗАНИЕ МЕР БЕЗОПАСНОСТИ</b> .....                                | <b>7</b>  |
| <b>9</b>   | <b>ПОРЯДОК РАБОТЫ</b> .....                                           | <b>7</b>  |
| <b>9.1</b> | <b>Процедуры регулирования активного сопротивления магазина</b> ..... | <b>7</b>  |
| 9.1.1      | Регулирование первой декады .....                                     | 7         |
| 9.1.2      | Регулирование второй декады .....                                     | 8         |
| 9.1.3      | Регулирование третьей декады .....                                    | 8         |
| 9.1.4      | Регулирование четвертой декады .....                                  | 8         |
| 9.1.5      | Регулирование пятой декады .....                                      | 9         |
| 9.1.6      | Имитация полного сопротивления петли .....                            | 9         |
| <b>10</b>  | <b>ПОВЕРКА МАГАЗИНА</b> .....                                         | <b>10</b> |
| <b>11</b>  | <b>ПРАВИЛА ОБСЛУЖИВАНИЯ И ХРАНЕНИЯ</b> .....                          | <b>10</b> |
| <b>12</b>  | <b>ТРАНСПОРТИРОВАНИЕ</b> .....                                        | <b>11</b> |
| 12.1       | Тара, упаковка .....                                                  | 11        |
| 12.2       | Условия транспортирования .....                                       | 11        |
| <b>13</b>  | <b>ПРИЛОЖЕНИЯ</b> .....                                               | <b>11</b> |
| 13.1       | Сведения об изготовителе и поставщике .....                           | 11        |
| 13.2       | Сведения о сервисном центре .....                                     | 11        |

**Внимание!**

**В связи с постоянной работой по совершенствованию изделия, повышающей его технико-эксплуатационные параметры, в конструкцию могут быть внесены незначительные изменения, не отраженные в настоящем издании.**

**Внимание!**

**Перед началом эксплуатации магазин необходимо выдержать в нормальных климатических условиях не менее 12 часов**

**Внимание!**

**Перед началом эксплуатации магазин необходимо обязательно заземлить, используя разъем  на передней панели прибора. После этого подключить сетевой кабель к соответствующему разъему на задней панели магазина. Работа магазина без заземления категорически запрещена.**

**Внимание!**

**При подаче питания к магазину ММС-1 от электрической сети следует размещать оборудование таким образом, чтобы не было трудностей с его отключением.**

## 1 Введение

Данное Руководство содержит информацию об устройстве и использовании магазина мер сопротивлений петли короткого замыкания ММС-1, эксплуатационных ограничениях, мерах безопасности при работе с ним и предназначено для лиц, работающих с магазином, а также для обслуживающего персонала.

Символы, отображенные на приборе:

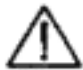

Перед работой с прибором необходимо изучить данное Руководство, тщательно соблюдать правила защиты, а также рекомендации Изготовителя.

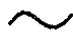

Переменный ток

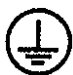

Клемма защитного проводника

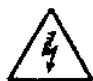

Внимание, опасное напряжение

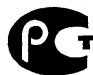

Сертификат соответствия средств измерения, Государственный стандарт РФ.

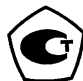

Сертификат утверждения типа в Государственном реестре средств измерений.

## 2 Назначение

Магазин мер сопротивлений петли короткого замыкания ММС-1 предназначен для имитации и задания меры активного сопротивления петли короткого замыкания электросети с напряжением 220/380В(230/400В), 50 Гц переменного тока.

Магазин мер сопротивлений петли короткого замыкания типа ММС-1 применяется как эталонное оборудование для поверки (калибровки) и сертификационных испытаний измерителей серии МЗС, МІЕ, МRP, МРІ и других по параметрам короткого замыкания петли «фаза-нуль», «фаза-земля», «фаза-защитный проводник» и «фаза-фаза» с кратковременным (до 30-40 мс) измерительным током до 45 А.

Магазин мер сопротивлений петли короткого замыкания типа ММС-1 (далее по тексту: магазин) обеспечивает ступенчатое регулирование активного сопротивления в диапазоне от 0,1Ω до 4111Ω с пределами допускаемой основной погрешности ± 0,1% на первой декаде и ± 0,05% на остальных декадах.

Сопротивления магазина характеризуются высокой допустимой мощностью рассеивания, что обеспечивает возможность их использования в измерительных цепях.

Сопротивления магазина соответствуют всем требованиям, которые предъявляются лабораториями поверки и испытаний средств измерений к магазинам сопротивлений и могут быть использованы и в других измерительных схемах постоянного и переменного тока.

## 3 Технические данные

| № декады магазина | Номинальные значения активного сопротивления R, Ом | Предел допускаемой абсолютной погрешности воспроизведения | Максимальное значение импульсного тока при кратковременном (30 – 40 мс) пропускании, А |
|-------------------|----------------------------------------------------|-----------------------------------------------------------|----------------------------------------------------------------------------------------|
| декада I          | 0,1/0,2/0,3/0,4/0,5/0,6/0,7/0,8/0,9/1,0            | ± 0,001·R                                                 | 45                                                                                     |
| декада II         | 1/2/3/4/5/6/7/8/9/10                               | ± 0,0005·R                                                | 35                                                                                     |
| декада III        | 10/20/30/40/50/60/70/80/90/100                     | ± 0,0005·R                                                | 15                                                                                     |
| декада IV         | 100/200/300/400/500/600/700/800/900/1000           | ± 0,0005·R                                                | 2                                                                                      |
| декада V          | 1000/2000/3000                                     | ± 0,0005·R                                                | 0,3                                                                                    |

Начальное сопротивление магазина (сопротивление при установке всех декад переключателей на нулевые показания) не превышает 0,025 Ом.

Магазин предназначен для работы при температуре окружающей среды от 10 до 30 °С, относительной влажности от 25 до 60% и атмосферном давлении от 630 до 800 мм рт.ст. Условия хранения магазина указаны в п.11 настоящего руководства.

Дополнительные технические характеристики:

- Нормальные значения температуры (20 ± 5) °С
- Рабочая область температуры (20 ± 10) °С
- Предел допускаемого значения дополнительной погрешности, вызванной изменением температуры окружающей среды от нормальной, в пределах рабочей области температур, равен классу точности.
- Максимальное рабочее напряжение: 450 В
- Время цикла измерений T<sub>изм</sub>: ≤ 30-40 мс
- Время остывания (паузы) T<sub>пауз</sub>: при U<sub>изм</sub> до 230В ≥ 20с

- Сопротивление изоляции:
- Габаритные размеры:
- Масса:

при  $U_{изм}$  до 450В  $\geq 25с$   
 $> 100$  МОм  
 500 x 340 x 170 мм  
 не более 12 кг

#### 4 Устройство и принцип работы

Лицевая панель магазина с функциональными переключателями изображена на рис.1, схема соединений декад магазина показана на рис.2, а схема подключений магазина при имитации активного сопротивления петли короткого замыкания – на рис.3.

Магазин сопротивлений типа ММС-1 состоит из пяти декад, соединенных последовательно. На первой позиции находится декада с самым маленьким значением активного сопротивления ступени ( $\times 0,1$  Ом), а на последней – декада с самым большим значением активного сопротивления ступени ( $\times 1000$  Ом). Регулирование настройки сопротивления начинается с самой нижней декады, а заканчивается – на наивысшей декаде, при этом обязательно должен соблюдаться тот принцип, что все декады, установленные ниже, находятся на максимальных значениях.

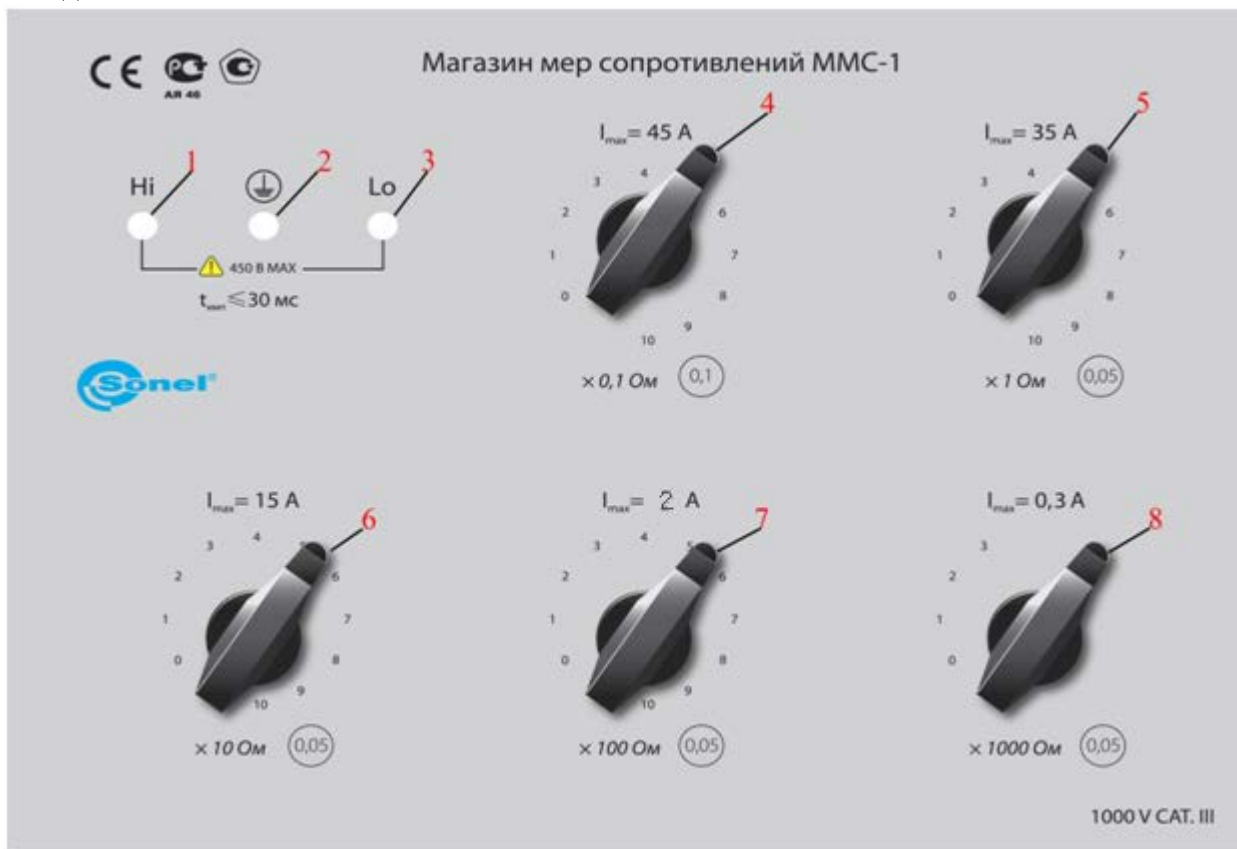

Рис.1. Лицевая панель магазина ММС-1:

- 1 – входной разъем подключения внешнего напряжения фазы (Н);
- 2 – разъем защитного заземления (РЕ);
- 3 – выходной разъем подключения поверяемого средства измерений (L);
- 4 – поворотный переключатель (множитель) первой декады;
- 5 – поворотный переключатель (множитель) второй декады;
- 6 – поворотный переключатель (множитель) третьей декады;
- 7 – поворотный переключатель (множитель) четвертой декады;
- 8 – поворотный переключатель (множитель) пятой декады.

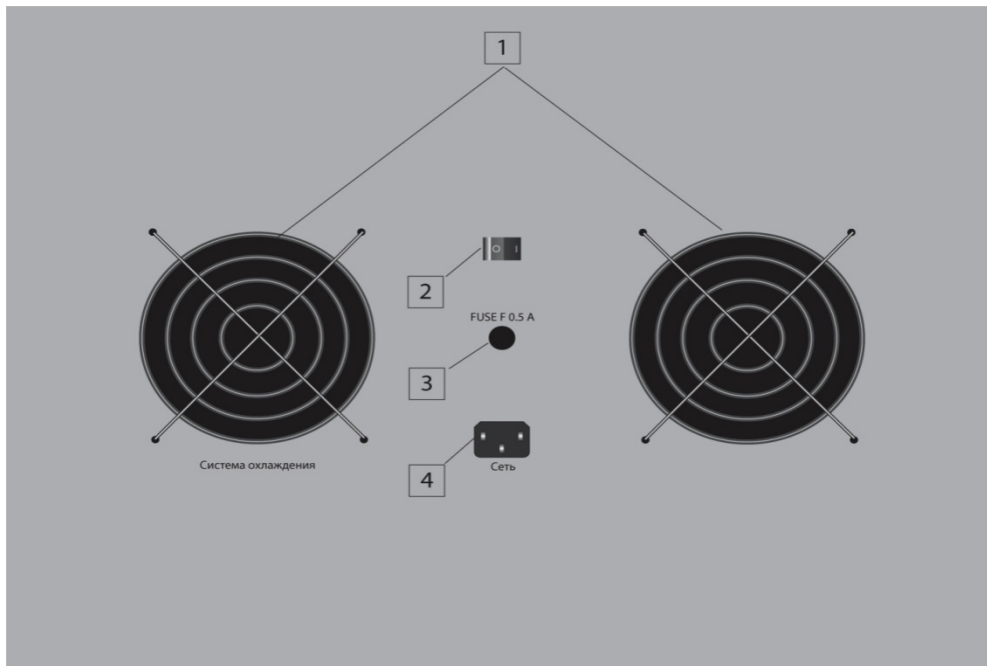

Рис.1.1 Боковая панель магазина MMC-1

- 1 – воздухоотводы;
- 2 – выключатель системы охлаждения;
- 3 – плавкий предохранитель (F 0,5 А);
- 4 – разъем для подключения сетевого кабеля.

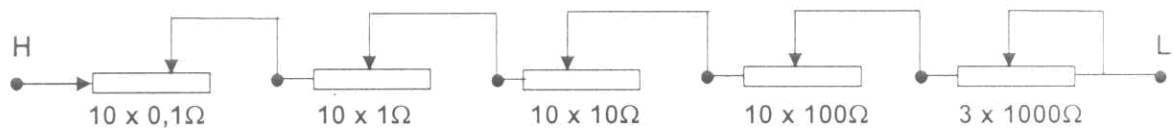

Рис.2. Схема соединения декад магазина.

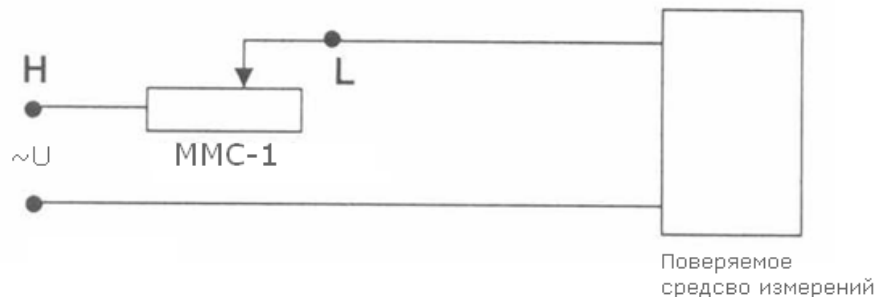

Рис.3. Измерительная система для поверки измерителей параметров цепей короткого замыкания.

## 5 Маркирование и пломбирование

Наименование и условное обозначение магазина, товарный знак предприятия нанесены в верхней части лицевой панели.

Заводской порядковый номер магазина и год изготовления расположены на задней панели.

Магазин, принятый ОТК, пломбируется самоклеющимися саморазрушающимися при вскрытии корпуса пломбами, которые расположены на защелках на верхней панели.

## 6 Общие указания по эксплуатации

Техническое обслуживание магазина проводится с целью обеспечения его постоянной исправности и готовности к использованию.

В процессе технического обслуживания необходимо проверять:

- сохранность пломб;
- комплектность магазина;
- отсутствие внешних механических повреждений;
- чистоту разъемов и гнезд;
- состояние лакокрасочных покрытий, гальванических покрытий и четкость гравировки;
- состояние соединительных кабелей и переходов.

При работе магазина категорически запрещается ставить его на переднюю и заднюю панели, что может привести к поломке органов управления и ввода сетевого шнура.

## 7 Указание мер безопасности

К работе с магазином допускаются лица, прошедшие инструктаж по технике безопасности при работе с электроприборами.

Перед включением магазина в сеть необходимо проверить исправность сетевого шнура питания.

Перед началом измерений нужно проверить, подключены ли провода к соответствующим измерительным гнездам;

Ремонт магазина должен осуществляться только представителями авторизованного Сервисного центра.

**Внимание!**  
**Запрещается использование магазина без включенной системы охлаждения и/или с затрудненным путем воздухоотвода.**

## 8 Порядок работы

Например, нам нужно установить значение активного сопротивления, которое равно 2Ом. Для этого декаду, обозначенную как 10 x 0,1 установить на позицию «10» (1Ом), а декаду, обозначенную 10 x 1Ом, установить в позицию «1» (1Ом), тогда получим требуемое значение 2Ом. Используя вышеуказанный способ регулирования, в этом случае в цепь будут включены 11 сопротивлений, и на каждом из них откладывается пропорциональная часть мощности, затрачиваемой в цепи.

Недопустима установка второй декады в позицию «2» (2Ом), когда декада 10 x 0,1Ом установлена в позиции «0» и мощность, затрачиваемая на сопротивлении 2Ом, во второй декаде будет на 100% больше допустимой мощности рассеивания.

Алгоритм правильной установки сопротивлений по декадам указан в п.9.1

**Внимание!**  
**Несоблюдение вышеуказанной процедуры настройки магазина сопротивлений может привести к его чрезмерному перегреву и выходу из строя.**

### 8.1 Процедуры регулирования активного сопротивления магазина

#### 8.1.1 Регулирование первой декады

На первой декаде (обозначенной 10 x 0,1Ом) можно установить каждое значение активного сопротивления в диапазоне 0,1Ом...1,0Ом (более высокие декады должны быть установлены в позиции „0“, рис.4).

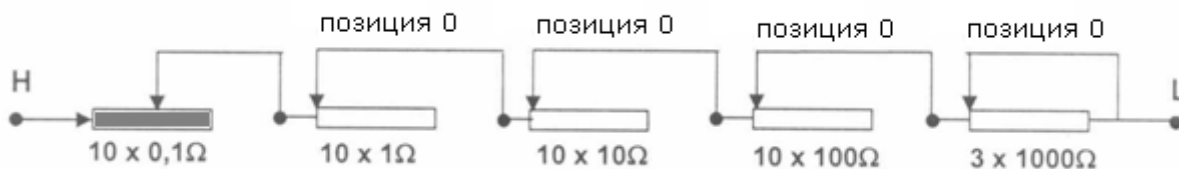

Рис.4 Система соединений при регулировании активного сопротивления первой декадой.

### 8.1.2 Регулирование второй декады

С целью перехода к регулированию активного сопротивления второй декадой, первая декада должна оставаться в позиции „10“ (т.е. на значении, равном 1 Ом, рис.5),

На второй декаде (обозначенной как 10 x 1 Ом) можно установить каждое значение активного сопротивления в диапазоне 1 Ом...11 Ом (более высокие декады должны быть установлены в позиции „0“), т.о. получают суммарное значение активного сопротивления в диапазоне:  $R_{min} < R < R_{max}$ .

$$R_{min} = 1 \text{ Ом} + 1 \text{ Ом} = 2 \text{ Ом}$$

$$R_{max} = 1 \text{ Ом} + 10 \text{ Ом} = 11 \text{ Ом}$$

**Внимание: не рекомендуются все другие настройки, напр., 3,2 Ом; 5,7 Ом и т.д.**

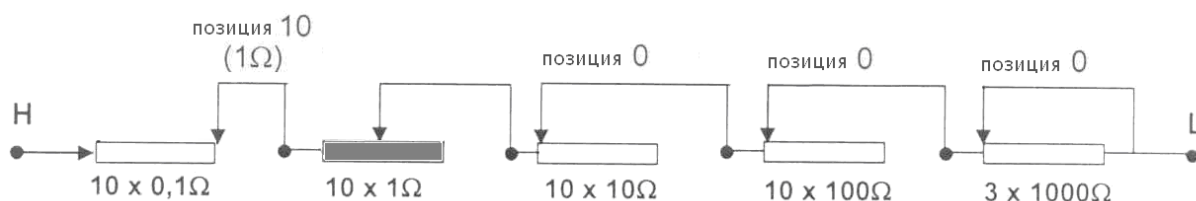

Рис.5. Система соединений при регулировании активного сопротивления второй декадой.

### 8.1.3 Регулирование третьей декады

С целью перехода к регулированию активного сопротивления третьей декадой, первая декада должна оставаться установленной в позицию „10“ (т.е. на значение 1 Ом), а вторую декаду необходимо установить в позицию 9 (т.е. на значение 9 Ом), рис.6.

На третьей декаде (обозначенной как 10 x 10 Ом) можно настроить каждое значение активного сопротивления в диапазоне 10 Ом...110 Ом (более высокие декады должны быть установлены в позиции „0“), т.о. получают суммарное значение активного сопротивления в диапазоне:

$$\text{от } R_{min} = 1 \text{ Ом} + 10 \text{ Ом} + 10 \text{ Ом} = 21 \text{ Ом}$$

$$\text{до } R_{max} = 1 \text{ Ом} + 10 \text{ Ом} + 100 \text{ Ом} = 111 \text{ Ом}$$

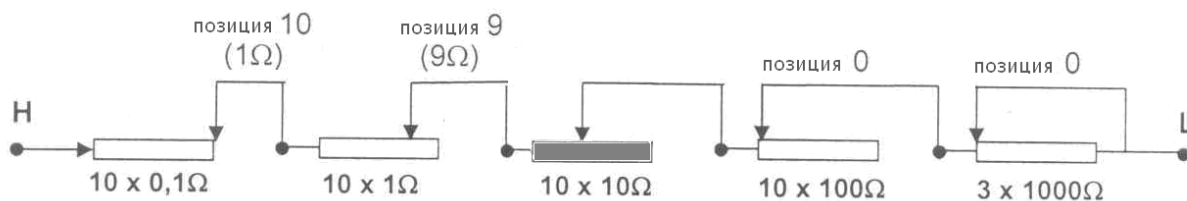

Рис.6. Система соединений при регулировании активного сопротивления третьей декадой.

**Внимание: не рекомендуются все другие настройки, кроме вышеуказанных.**

### 8.1.4 Регулирование четвертой декады

С целью перехода к регулированию активного сопротивления четвертой декадой, первая декада должна оставаться установленной в позицию „10“ (т.е. на значении 1 Ом), а вторую декаду необходимо установить в позицию „9“ (т.е. на значение 90 Ом), рис.7.

На четвертой декаде (обозначенной как 10 x 100 Ом) можно настроить каждое значение активного сопротивления в диапазоне 100 Ом...1100 Ом (более высокие декады должны быть установлены в позиции „0“), т.о. получают суммарное значение активного сопротивления в диапазоне:



от  $R_{\min} = 1\text{Ом} + 10\text{ Ом} + 100\text{ Ом} + 100\text{ Ом} = 211\text{ Ом}$   
до  $R_{\max} = 1\text{Ом} + 10\text{ Ом} + 100\text{ Ом} + 1000\text{ Ом} = 1111\text{ Ом}$

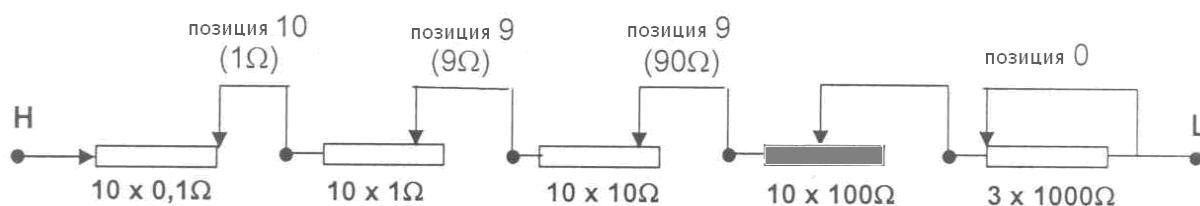

Рис.7. Система соединений при регулировании активного сопротивления четвертой декадой.

**Внимание: не рекомендуются все иные настройки.**

### 8.1.5 Регулирование пятой декады

С целью перехода к регулированию активного сопротивления пятой декадой, первая декада должна оставаться установленной в позицию „10“ (т.е. на значении 10м), вторую декаду необходимо установить в позицию „9“ (т.е. на значении 90м), третья декада должна быть установлена в позиции „9“ (или же на значении 900м), четвертую декаду необходимо установить в позицию „9“ (или же на значение 9000м, рис.8),

На пятой декаде (обозначенной как 3 x 1000Ом) можно настроить каждое значение активного сопротивления в диапазоне 1000Ом...4000 Ом, т.о. получают суммарное значение активного сопротивления в диапазоне:

от  $R_{\min} = 1\text{Ом} + 10\text{ Ом} + 100\text{ Ом} + 1000\text{ Ом} + 1000\text{ Ом} = 2111\text{ Ом}$   
до  $R_{\max} = 1\text{Ом} + 10\text{ Ом} + 100\text{ Ом} + 1000\text{ Ом} + 3000\text{ Ом} = 4111\text{ Ом}$

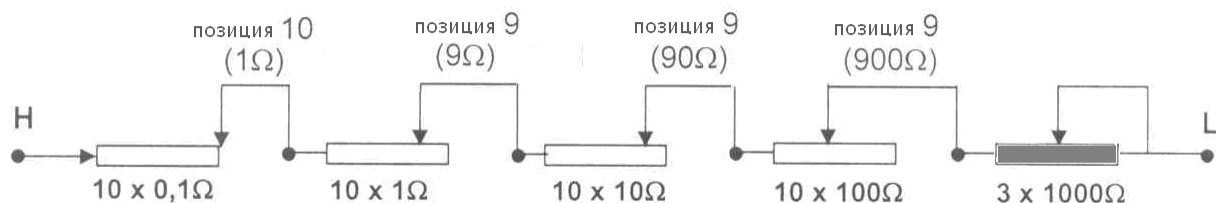

Рис.8. Система соединений при регулировании активного сопротивления пятой декадой.

Измерители параметров петли короткого замыкания можно также поверять начиная с наибольшего значения активного сопротивления петли. С этой целью декады магазина необходимо настроить в соответствии с рис.8. Затем регулирование осуществляется начиная с пятой декады, после чего поочередно уменьшаются значения четвертой, третьей, второй и первой декады.

Описанный способ настройки магазина обеспечивает включение в ряд всех используемых сопротивлений, благодаря чему многократно уменьшается рассеиваемая на них мощность.

### 8.1.6 Имитация полного сопротивления петли

В случае необходимости имитации полного сопротивления петли короткого замыкания последовательно с магазином необходимо включить внешнюю эталонную катушку. Схема соединений измерительной системы показана на рис.9.

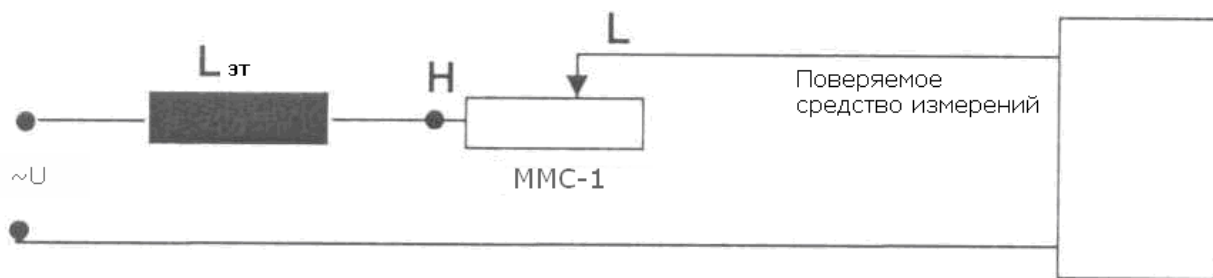

Рис.9. Измерительная система для моделирования полного сопротивления петли короткого замыкания.

## 9 Поверка магазина

Поверка магазина ММС-1 должна проводиться Органами Метрологической Службы, аккредитованными в Федеральном Агентстве по техническому регулированию и метрологии на право поверки, в соответствии с документом «ММС-1-13 МП» методика поверки.

Межповерочный интервал – 1 год.

## 10 Правила обслуживания и хранения

Оператор, проводящий измерения на магазине ММС-1, может проводить следующие работы по сервисному обслуживанию магазина:

- замена предохранителя;
- чистка магазина.

Параметры внутреннего плавкого предохранителя – F 0,5А.

**Внимание!**  
**Перед заменой плавкого предохранителя, обязательно осуществить отключение магазина от сети питания.**

Корпус магазина ММС-1 можно чистить мягкой сухой тканью. Запрещается использовать растворители и абразивные чистящие средства (порошки, пасты и так далее). Электронная схема ММС-1 не нуждается в чистке, за исключением гнезд подключения измерительных проводников.

Все остальные работы по сервисному обслуживанию проводятся только в авторизованном сервисном центре ООО «СОНЭЛ».

Питание системы охлаждения магазина осуществляется от сети переменного тока 220В, 50 Гц.

ММС-1, упакованный в потребительскую и транспортную тару в соответствии со сборочными чертежами, может транспортироваться любым видом транспорта на любые расстояния.

ММС-1, упакованный в потребительскую и транспортную тару в соответствии со сборочными чертежами до ввода в эксплуатацию должен храниться при температуре окружающего воздуха 5-40°C и относительной влажности воздуха до 80% при температуре +25°C.

Хранение ММС-1 без упаковки следует производить при температуре окружающего воздуха 10-35 °С и относительной влажности воздуха 80% при температуре +35°C.

В помещениях для хранения не должно быть пыли, паров, кислот, щелочей, вызывающих коррозию.

Нормальные условия окружающей среды

- на высотах до 2000 м;
- рабочая температура от 10° до 35°C
- температура хранения от -20°C до +60°C

- при максимальной относительной влажности 80 % для температур до 31°C и с линейным уменьшением относительной влажности до 50% при увеличении температуры до 40°C

Срок хранения в консервации и упаковке изготовителя 5 лет .

## 11 Транспортирование

### 11.1 Тара, упаковка

Для обеспечения сохранности магазина при транспортировании используется укладочная коробка.

Упаковывание магазина производится в следующей последовательности:

- корпус магазина поместить в полиэтиленовую упаковку, перевязать шпагатом и поместить в коробку;
- эксплуатационную документацию поместить в полиэтиленовый пакет и уложить на магазин или между боковой стенкой коробки и магазином;
- товаросопроводительную документацию в пакете поместить под крышку коробки;
- обтянуть коробку пластиковой лентой и опломбировать.

### 11.2 Условия транспортирования

Транспортирование магазина в укладочной коробке производится всеми видами транспорта на любые расстояния.

При транспортировании должна быть предусмотрена защита от попадания атмосферных осадков и пыли. Не допускается кантование.

## 12 ПРИЛОЖЕНИЯ

### 12.1 Сведения об изготовителе и поставщике

Поставщик прибора в Россию и СНГ, осуществляющим гарантийное и послегарантийное обслуживание:

ООО «СОНЭЛ», Россия

142713, Московская обл., Ленинский р-н, Григорчиково, ул. Майская, 12

тел./факс +7(495) 287-43-53;

E-mail: [info@sonel.ru](mailto:info@sonel.ru); Internet: [www.sonel.ru](http://www.sonel.ru)

### 12.2 Сведения о сервисном центре

Гарантийный и послегарантийный ремонт прибора осуществляют авторизованные **Сервисные центры**. Обслуживанием Пользователей в России занимается Сервисный центр в г. Москва, расположенный по адресу:

ООО «СОНЭЛ», Россия

115533 г. Москва, проспект Андропова, д. 22, БЦ «Нагатинский» офис 2, этаж 5

Тел.: +7 (495) 995-20-65

E-mail: [standart@sonel.ru](mailto:standart@sonel.ru),

Internet: [www.sonel.ru](http://www.sonel.ru)

Чтобы узнать адреса Сервисных центров в других странах мира, обратитесь к Изготовителю.
